# Supplementary material
Source: PubMed Central journal article supplement (PMC5323095)
Supplement: NIHMS804944-supplement-1.pdf [file NIHMS804944-supplement-1.pdf]

## **Supplementary Information**

Online Methods

Supplementary Figs. S1-7

Supplementary figure legends

Supplementary Tables S1 and S2

## **Supplementary Methods**

### **Generation of *auf1*<sup>-/-</sup> mice**

All *auf1*<sup>-/-</sup> KO mice and WT mice are of the 129/B6-background at F3 and F4 generation breeds from *auf1*<sup>+/-</sup> heterozygous mice. Ages varied from 3-12 months and are specified for each procedure (Lu and Schneider, 2004; Pont et al., 2012; Sadri and Schneider, 2009).

### **Actinomycin D treatment**

C2C12 cells were treated with 0.2 µg/ml actinomycin D (Sigma) for up to 2 h. RNA was extracted using Trizol as per manufacturer instructions. cDNA was generated using Promega GoScript reverse transcription system as per manufacturer instructions. qRT-PCR was completed using an Applied Biosystems 7500 Fast RT-PCR machine as per manufacture instructions. Experiments were analyzed in triplicate, then means and standard deviations calculated.

### **Quantitative real-time PCR (qRT-PCR) and analysis**

RNA was extracted using Trizol as per manufacturer instructions. cDNA was generated using Promega GoScript reverse transcription system as per manufacturer instructions. qRT-PCR was completed using an Applied Biosystems 7500 Fast RT-PCR machine as per manufacture instructions. Data were analyzed by comparative CT values with *GapDH* as an internal control.

### **Immunoblot studies**

In brief, cells were lysed in RIPA buffer or media was collected. Lysate was resolved by 12% PAGE and transferred overnight to a PVDF transfer membrane (Millipore). Membrane was blocked in 5% milk in TBS. Primary antibodies were incubated at 4°C overnight. Secondary ECL antibodies (GE Healthcare) were incubated for 1 h at room temperature. Protein was imaged using ThermoScientific SuperSignal and Genemate autoradiography film. The following antibody dilutions were used: rabbit antibody to AUF1 (Millipore, 07-260, 1:500), rabbit antibody to GapDH (Cell Signaling, 2118, 1:1000), rabbit antibody to cyclin D1 (Cell Signaling, 2922, 1:1000), mouse antibody to PAX7 (*in vivo*: DSHB 1:500; *in vitro*: Santa Cruz Biotechnology, SC-81648, 1:500)

### **RNA-seq bioinformatics analysis**

Sequenced fragments were quality controlled by examination using FAST-QC, and to assure removal of mitochondrial RNA, tRNAs and ribosomal RNAs, then aligned to the human reference genome using *Bowtie* (Langmead et al., 2009) and other alignment tools for short read alignment, *TopHat* for alignment to reference genomes for splice site locations (Trapnell et al., 2009; Trapnell and Salzberg, 2009), low counts filtered using *HtSeq Rawcounts*, and to quantify counts per gene, data normalized using the *Voom* function on the R-limma package, which examines mean variance for each gene to achieve normal distribution by lowest variance, then transcripts assembled and compared or merged with other short sequence reads using *Cufflinks* (Trapnell et al., 2010). *Limma differential expression* was used to compare total mRNA data sets as log<sub>2</sub> ratios and significance of mRNAs will be assessed using *P*-values, fold changes and the FDRs estimated based on t-tests. Studies were performed from 3 independent data sets. Other types of statistical analyses included supervised and unsupervised clustering and metabolic and biochemical pathway groupings using the *Intuition software* package.

**Microarrays and data analysis.** Purified mRNAs (50ng) from total or polysomal associated fractions were processed using the GeneChip WT PLUS Reagent Kit and hybridized to Human Transcriptome Array 2.0 chips from Affymetrix according to the manufacturer's instructions. Gene-level probeset summary of microarray data were obtained using the GCCN and SST transformation algorithm, RMA background correction, and quantile normalization provided in Expression Console Software, version 1.4.1 (Affymetrix). Control probesets and probesets lacking mRNA accession tags were removed from further analysis. To quantify translational efficiency, the difference in log<sub>2</sub> intensity between matched polysomal RNA and total RNA was determined. To examine differences in transcription and translation, total RNA and polysome RNA were quantile normalized separately. Statistical analysis was performed using the limma R package (Ritchie et al., 2015).

## References

- Langmead, B., Trapnell, C., Pop, M., and Salzberg, S.L. (2009). Ultrafast and memory-efficient alignment of short DNA sequences to the human genome. *Genome biology* 10, R25.
- Lu, J.Y., and Schneider, R.J. (2004). Tissue distribution of AU-rich mRNA-binding proteins involved in regulation of mRNA decay. *The Journal of biological chemistry* 279, 12974-12979.
- Pont, A.R., Sadri, N., Hsiao, S.J., Smith, S., and Schneider, R.J. (2012). mRNA decay factor AUF1 maintains normal aging, telomere maintenance, and suppression of senescence by activation of telomerase transcription. *Molecular cell* 47, 5-15.

Ritchie, M.E., Phipson, B., Wu, D., Hu, Y., Law, C.W., Shi, W., and Smyth, G.K. (2015). limma powers differential expression analyses for RNA-sequencing and microarray studies. *Nucleic Acids Res* 43, e47.

Sadri, N., and Schneider, R.J. (2009). *Auf1/Hnrnpd*-deficient mice develop pruritic inflammatory skin disease. *The Journal of investigative dermatology* 129, 657-670.

Trapnell, C., Pachter, L., and Salzberg, S.L. (2009). TopHat: discovering splice junctions with RNA-Seq. *Bioinformatics* 25, 1105-1111.

Trapnell, C., and Salzberg, S.L. (2009). How to map billions of short reads onto genomes. *Nature biotechnology* 27, 455-457.

Trapnell, C., Williams, B.A., Pertea, G., Mortazavi, A., Kwan, G., van Baren, M.J., Salzberg, S.L., Wold, B.J., and Pachter, L. (2010). Transcript assembly and quantification by RNA-Seq reveals unannotated transcripts and isoform switching during cell differentiation. *Nat Biotechnol* 28, 511-515.

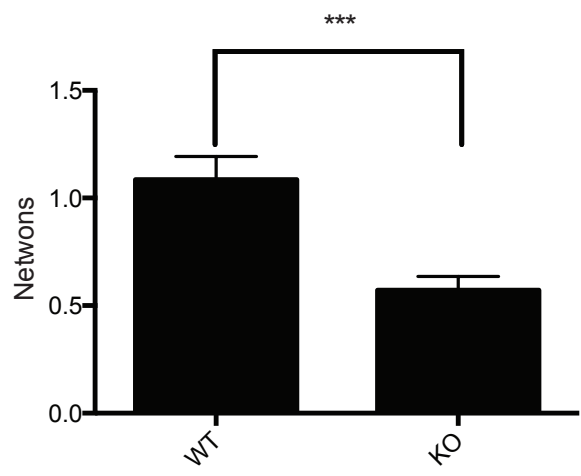

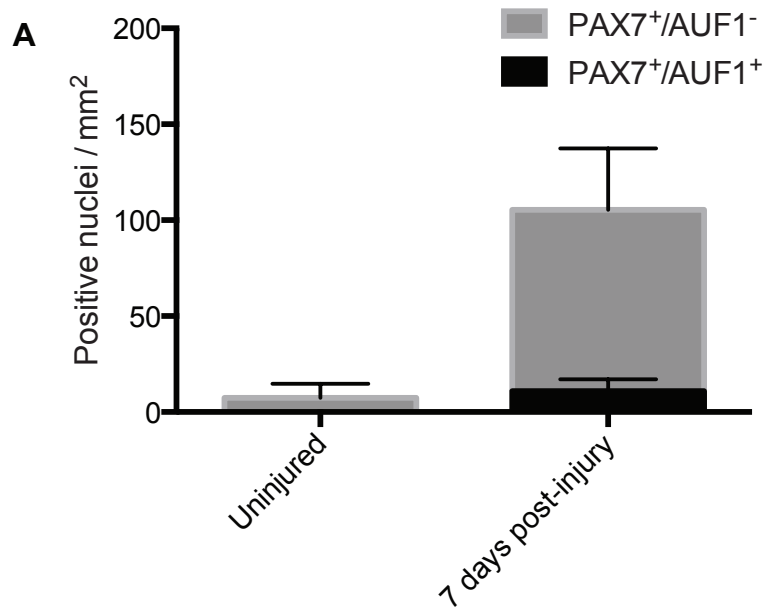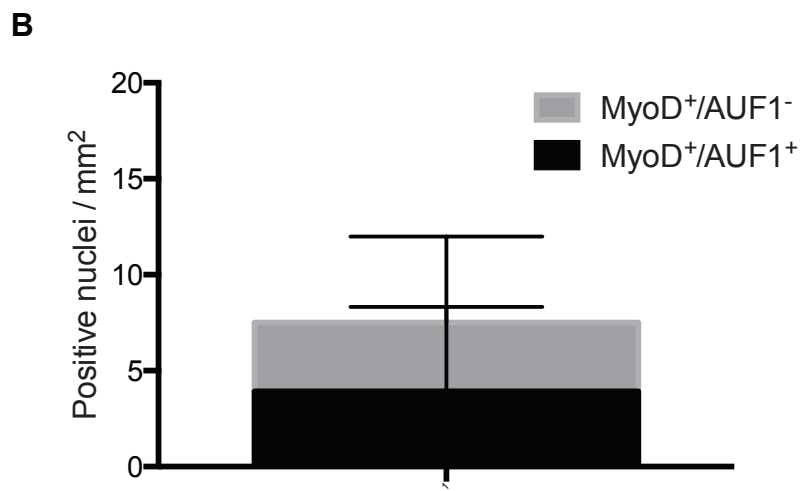

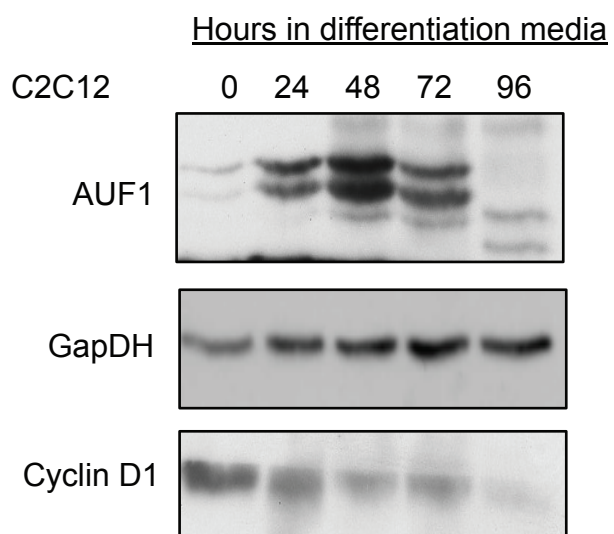

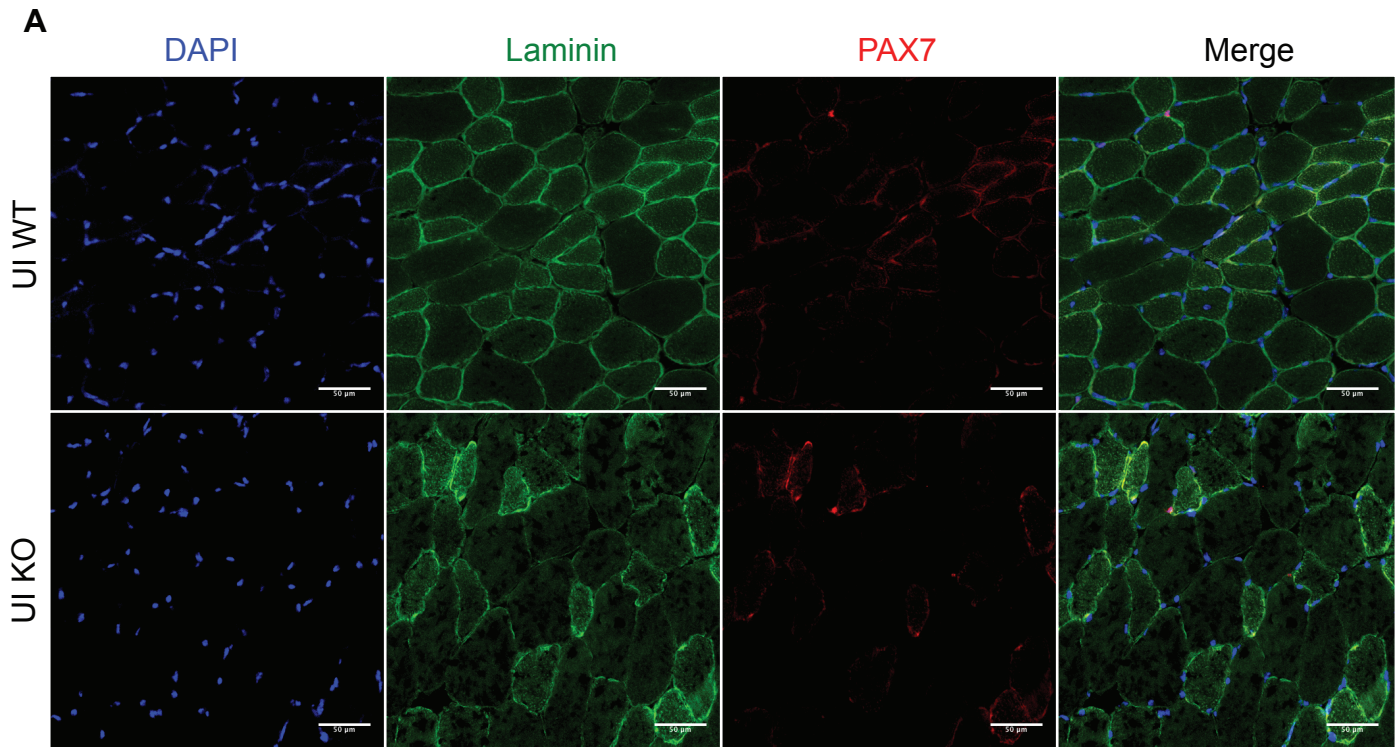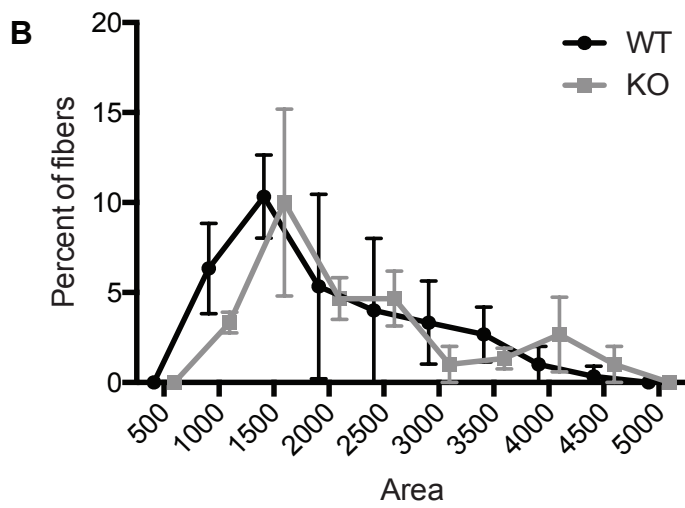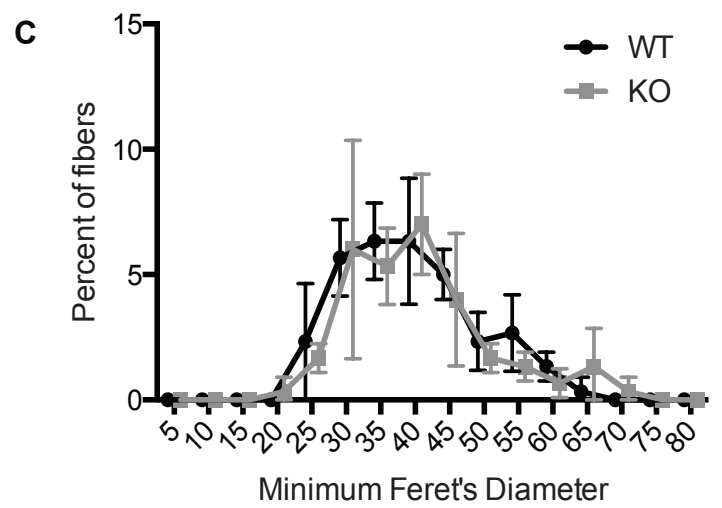



Chenette et al., Supplementary Figure 5 - Related to Figure 4

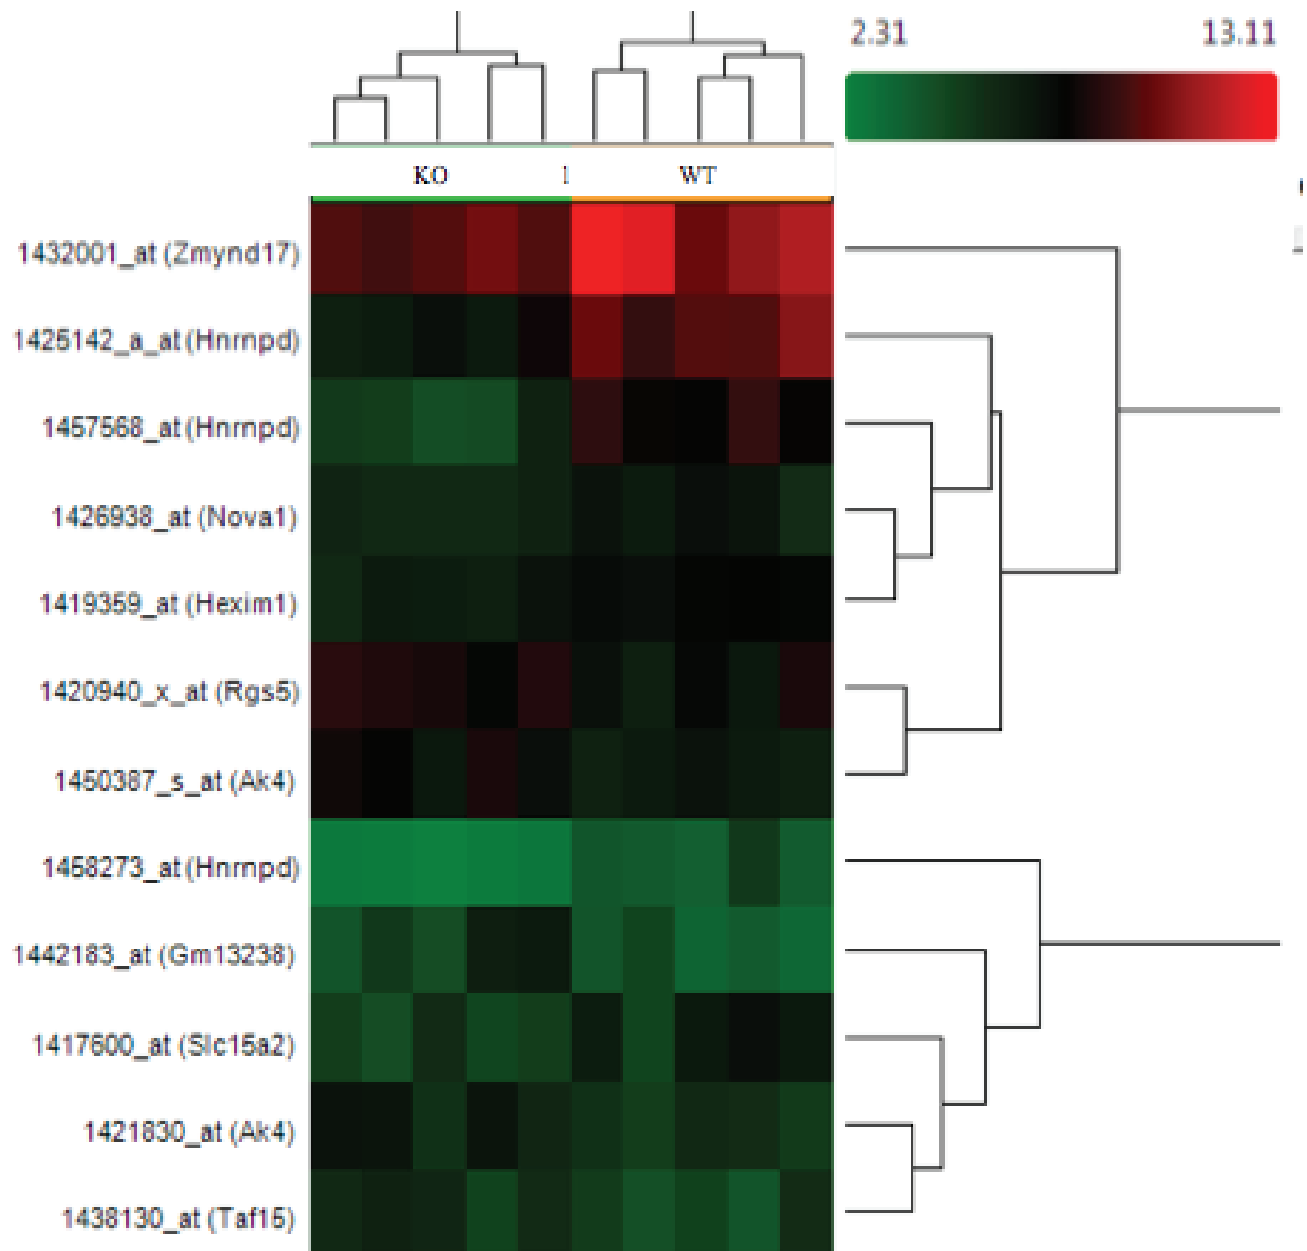

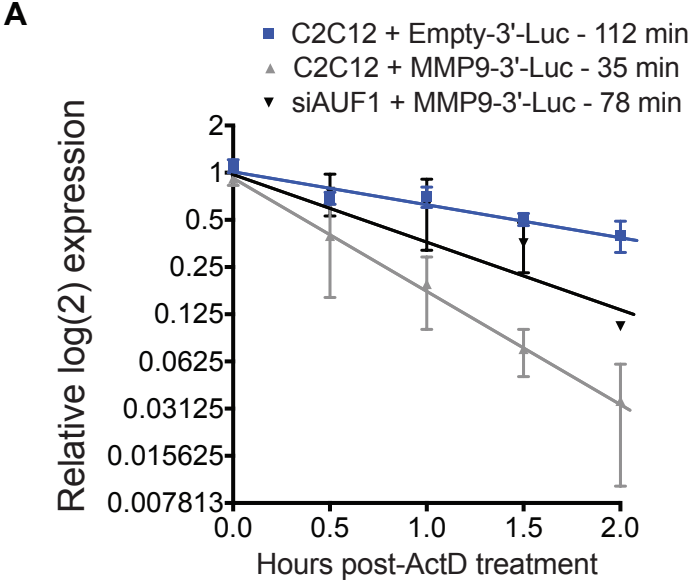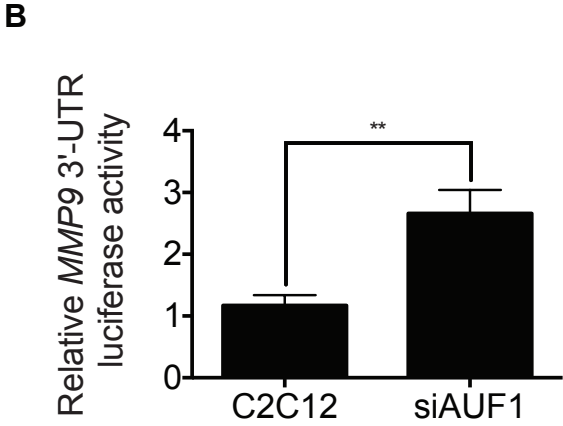

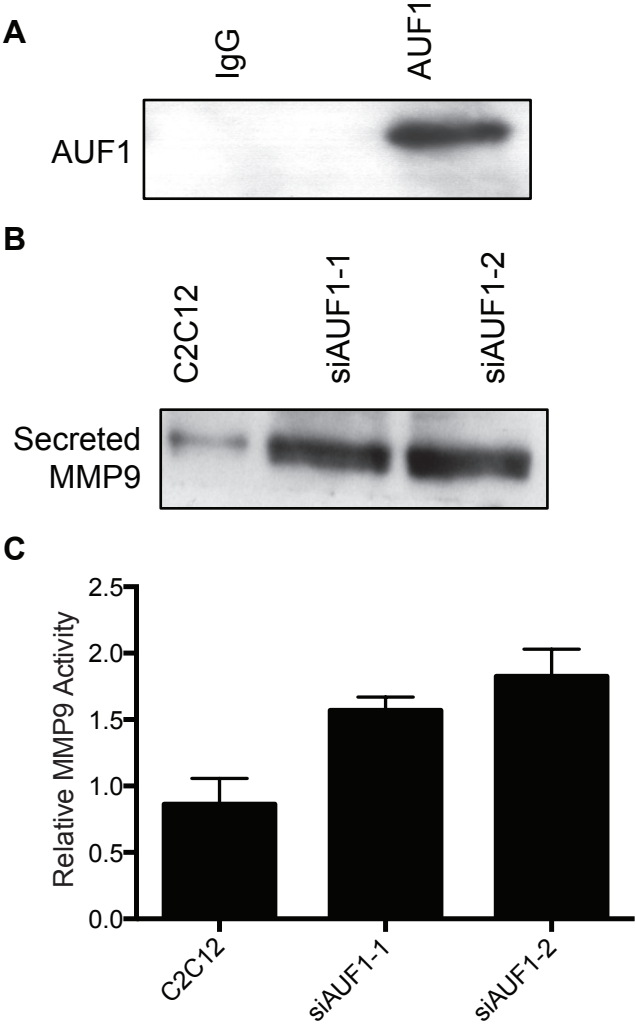

**Supplementary Figure 1, related to Figure 1** Aging KO mice are significantly weaker than WT mice – Related to Figure 1. Strength grip analysis of 4-8 month old mice. Five mice per genotype were tested in triplicate.  $P < 0.0005$ , unpaired t-test.

**Supplementary Figure 2, related to Figure 2** AUF1 is expressed in MyoD<sup>+</sup> satellite cells – Related to Figure 2. **(A)** Quantification of AUF1 co-localization to PAX7 in uninjured and 7 days post-injury TA muscle showing AUF1 is expressed in a subset of PAX7<sup>+</sup> satellite cells. **(B)** Quantification of AUF1 co-localization with MyoD in cultured myofibers showing AUF1 is expressed in over 50% of MyoD<sup>+</sup> satellite cells.

**Supplementary Figure 3, related to Figure 2** AUF1 is expressed in C2C12 cells. Protein levels of AUF1 were probed in differentiating C2C12 cells – Related to Figure 2. Cells were differentiated through serum starvation by growing to confluence and culturing in 2% horse serum. Time points were analyzed in triplicate. 50  $\mu$ g of protein were loaded per time point.

**Supplementary Figure 4, related to Figure 3** 4 month old KO skeletal muscle is not morphologically distinct from WT skeletal muscle prior to injury – Related to Figure 3. **(A)** Immunofluorescence staining for the expression of laminin (AF488, green), PAX7 (AF555, red), and nuclei (DAPI, blue) in 4 month old uninjured TA muscle. TA muscles were frozen in OCT, 5 images from 3 sections were analyzed per mouse and 3 mice were studied per genotype (scale bar 50  $\mu$ m). **(B)** Quantification of fiber size by area in uninjured TA muscle. Fiber area was calculated by ImageJ64. Five images from 3 sections were analyzed per mouse and 3 mice were studied per genotype (ns, 2 way ANOVA). **(C)** Quantification of fiber size by Minimum Feret's Diameter in uninjured TA muscle. Fiber Minimum Feret's Diameter was calculated by ImageJ64. Five images from 3 sections were analyzed per mouse and 3 mice were studied per genotype (ns, 2 way ANOVA).

**Supplementary Figure 5, related to Figure 4** MMP9 expression is not altered in bulk skeletal muscle – Related to Figure 4. Heat map of Affymetrix data from whole hindlimb

skeletal muscle. Whole hindlimb skeletal muscle from WT and KO 6 month old mice was surgically removed and RNA was extracted from the fibers according to manufacturer's instructions (TRIzol). Muscle was isolated from 5 mice per genotype. RNA was cleaned using RNeasy Mini Elute Kit (Qiagen) and analyzed on Affymetrix chips. Twelve genes were differentially expressed, significantly fewer than in satellite cells. Upregulated genes are shown in red and downregulated genes are shown in green.

**Supplementary Figure 6, related to Figure 4** AUF1 promotes the destabilization of *MMP9* through ARE-rich regions in the 3'UTR – Related to Figure 4. **(A)** The longest ARE-repeat (~200 kB) was cloned into the 3-UTR of a luciferase reporter pzeo-luc vector. This plasmid (MMP9-3'-LUC) or an empty plasmid (Empty-3'-Luc) was transiently transfected in untreated (C2C12) or siAUF1 treated (siAUF1) C2C12 cells for 48 hours. Cells were then treated with ActD for up to 4 hours. RNA was harvested using Trizol and analyzed with qRT-PCR analysis. (\*\* $P < 0.005$ , \* $P < 0.05$ , unpaired t-test). **(B)** In non-ActD treated cells, luciferase activity was measured using a Dual Luciferase Report Assay (Promega). (\*\* $P < 0.005$ , unpaired t-test).

**Supplementary Figure 7, related to Figure 4** High levels of MMP9 are secreted in the partial absence of AUF1 – Related to Figure 4. **(A)** Protein levels of AUF1 were probed following AUF1 immunoprecipitation with either anti-AUF1 or rabbit IgG (Santa Cruz) antibodies in C2C12 cells by immunoblot. Immunoprecipitation was analyzed in triplicate. 50  $\mu$ g of protein were loaded. **(B)** Protein levels of secreted MMP9 were probed from the media of cultured C2C12 cells treated with either vehicle or siAUF1. Two siAUF1 sequences were used. Experiments were performed in triplicate. 50  $\mu$ g of protein were loaded. **(C)** Quantification of MMP9 activity using EnzChek ELISA activity assay. Media was tested from C2C12 cells treated with vehicle or siAUF1. Two siAUF1 sequences were used. Experiments were performed in triplicate.

**Table S1:** mRNAs altered in expression in AUF1<sup>-/-</sup> satellite cells

| Gene          | log2             | ARE |
|---------------|------------------|-----|
| Acan          | Undetected in WT | **  |
| Clec3a        | Undetected in WT |     |
| Glr3          | Undetected in WT | **  |
| Gm10451       | Undetected in WT |     |
| Nudt10        | Undetected in WT |     |
| Rbp2          | Undetected in WT |     |
| Serpinb7      | Undetected in WT | **  |
| Gm10664       | Undetected in WT |     |
| Gpr143        | Undetected in WT |     |
| Ifng          | Undetected in WT | **  |
| Il17a         | Undetected in WT | **  |
| Lrrc6         | Undetected in WT | **  |
| Nxf7          | Undetected in WT |     |
| Olf561        | Undetected in WT | *   |
| Rnaset2b      | Undetected in WT |     |
| Serpina11     | Undetected in WT |     |
| Slc9a4        | Undetected in WT | **  |
| Upk3a         | Undetected in WT |     |
| Il10          | 4.39043          | **  |
| 1100001G20Rik | 3.95336          |     |
| S100a8        | 3.92684          |     |
| S100a9        | 3.84433          |     |
| Mmp8          | 3.64128          |     |
| Camp          | 3.62679          |     |
| Ly6c2         | 3.50382          | *   |
| Chi3l3        | 3.49607          |     |
| Retnlg        | 3.49241          |     |
| Spi1          | 3.48521          | *   |
| Igj           | 3.45704          | **  |
| Trem3         | 3.45536          |     |
| Ngp           | 3.39607          |     |
| Fpr1          | 3.33711          |     |
| Hp            | 3.32877          |     |
| Prg2          | 3.29363          |     |
| Ltf           | 3.25381          | **  |
| Mpo           | 3.24544          |     |
| Ms4a4c        | 3.1774           | **  |
| Ifitm6        | 3.16461          | *   |
| Lcn2          | 3.1227           |     |
| Fcnb          | 3.05636          |     |
| Clec4d        | 3.05123          | **  |
| Sell          | 3.03807          |     |
| Nkg7          | 3.03528          |     |
| 1810033B17Rik | 2.93916          |     |
| Cd177         | 2.93699          |     |
| BC018473      | 2.80585          |     |
| Il1rn         | 2.76114          |     |
| Ccl8          | 2.75957          |     |
| Clec4e        | 2.72767          |     |

|          |          |    |
|----------|----------|----|
| Irg1     | 2.69337  | *  |
| Epx      | 2.67661  | *  |
| Ifi2712a | 2.55783  |    |
| Cyp1a1   | 2.53325  |    |
| Cd52     | 2.50045  |    |
| Samsn1   | 2.40563  | ** |
| Ccr7     | 2.39861  |    |
| Ccnb2    | 2.36848  |    |
| Il1r2    | 2.34967  |    |
| Cyp4f18  | 2.31217  |    |
| Slfn4    | 2.26772  | ** |
| Parvg    | 2.24493  |    |
| Rdh12    | 2.22375  | *  |
| Fgr      | 2.22284  | ** |
| Oasl1    | 2.18429  |    |
| Trem1    | 2.1539   |    |
| Napsa    | 2.09279  |    |
| Rac2     | 1.9299   |    |
| H19      | 1.90029  |    |
| Pglyrp1  | 1.87053  |    |
| Mmp9     | 1.80339  | ** |
| Coro1a   | 1.79058  |    |
| Ccr2     | 1.77478  | ** |
| Cytip    | 1.75695  |    |
| Ncf1     | 1.75443  | ** |
| Adam8    | 1.70573  |    |
| Il1b     | 1.67181  | ** |
| Chi3l1   | 1.66464  |    |
| Irf7     | 1.6173   |    |
| G0s2     | 1.60887  |    |
| Tyrobp   | 1.58677  |    |
| Plaur    | 1.32265  | ** |
| Ret      | -1.61664 |    |
| Zer1     | -1.6413  |    |
| Gbp1     | -1.96314 | ** |
| Nxpe4    | -2.0992  | ** |
| Erdr1    | -2.12255 |    |
| Plvap    | -2.27937 | *  |
| Nuak1    | -2.5782  | ** |
| Col11a1  | -2.59413 | ** |
| Hal      | -2.78574 | ** |
| Col2a1   | -4.97584 | ** |

mRNAs altered in abundance in satellite cells as determined by RNA-Seq analysis. Ninety-one genes were identified, indicated by the gene abbreviated name, and the log2 fold change from RNA-Seq analysis was reported. Transcripts containing probable ARE sequences in the 3'UTR are marked with an asterisk (\*). Transcripts containing at least two ARE pentamers are marked with two asterisks (\*\*). Transcripts decreased in abundance are indicated by a minus sign.

**Table S2:** Known AUF1 ARE-mRNA targets altered in expression in AUF1<sup>-/-</sup> satellite cells

| Gene    | AREs | Fold change      | Linked to skeletal muscle regeneration |
|---------|------|------------------|----------------------------------------|
| CCR2    | 10   | 3.4              | Y                                      |
| Col11a1 | 12   | -5               | N                                      |
| IL17a   | 13   | Undetected in WT | N                                      |
| MMP9    | 11   | 3.6              | Y                                      |

Identification of known AUF1 target mRNAs altered in AUF1<sup>-/-</sup> satellite cells. Genes significantly altered in the AUF1<sup>-/-</sup> satellite cells detected by RNA-Seq analysis were subject to in silico characterization for known AUF1 association. Four genes were identified. Shown are the gene abbreviated name, number of predicted AUF1-targeted ARE motifs in the mRNA 3'UTR, the fold change extrapolated from the log2 change calculated from RNA-Seq analysis, and whether the gene has been linked to skeletal muscle regeneration (Y = Yes, N = No). Genes decreased in abundance are indicated by a minus sign.
