# Supplementary material
Source: PubMed Central journal article supplement (PMC5323095)
Supplement: NIHMS804944-supplement-2.pdf [file NIHMS804944-supplement-2.pdf]

## **Supplementary Information**

Online Methods

Supplementary Figs. S1-7

Supplementary figure legends

Supplementary Tables S1 and S2
